# Supplementary material for: Fluorescence of a triple-stranded helicate iron(iii) complex from a novel bis-β-diketone ligand: synthesis, structure and spectroscopic studies
Source: Royal Society of Chemistry journal article supplement (doi:10.1039/c6ce01231k), 2016-01-01
Supplement: c6ce01231k1.pdf [file c6ce01231k1.pdf]

## Electronic Supplementary Information

# Fluorescence of a Triple-Stranded Helicate Iron(III) Complex from a Novel Bis- $\beta$ -diketone Ligand: Synthesis, Structure and Spectroscopic Studies

Fang Zou,<sup>a</sup> Xiao Tang,<sup>a</sup> Yuhong Huang,<sup>a</sup> Shigang Wan,<sup>a</sup> Fa Lu,<sup>a</sup> Zhe-Ning Chen,<sup>\*b</sup> Anan Wu<sup>\*a</sup> and Hui Zhang<sup>a</sup>

<sup>a</sup> Department of Chemistry, College of Chemistry and Chemical Engineering, Xiamen University, Xiamen 361005, China. E-mail: ananwu@xmu.edu.cn

<sup>b</sup> Department of Chemistry, The University of Hong Kong, Pokfulam Road, Hong Kong, China. E-mail: zheningchen@gmail.com

### Contents

1. **Table S1.** Selected bond length and angles of complex  $\text{Fe}_2(\text{BOBA})_3$ .
2. **Table S2.** Selected bond length and angles of complex  $\text{Cd}(\text{BOBA})_2(\text{py})_3$ .
3. **Table S3.** Selected bond length and angles of ligand BOBA.
4. **Figure S1.** Dimer structure of ligand BOBA molecular showing intermolecular hydrogen bonds.
5. **Figure S2.** Perspective views of hydrogen bond network and  $\pi$ - $\pi$  stacking interactions in BOBA.
6. **Figure S3.** Perspective views of hydrogen bonds interactions in complex  $\text{Fe}_2(\text{BOBA})_3$ .
7. **Figure S4.** Space fill representation of complex  $\text{Fe}_2(\text{BOBA})_3$ , the nonmetal atoms of three strands and iron atoms are differently colored for clarity.
8. **Figure S5.**  $^1\text{H}$  NMR (500 MHz) spectra of ligand BOBA in  $(\text{CD}_3)_2\text{CO}$ .
9. **Figure S6.**  $^{13}\text{C}$  NMR (500 MHz) spectra of ligand BOBA in THF- $d_8$ .
10. **Figure S7.** Emission spectra of ligand BOBA and complex  $\text{Cd}(\text{BOBA})_2(\text{py})_3$  ( $\lambda_{\text{exc}} = 289$  nm,  $5.0 \times 10^{-6}$  M in degassed  $\text{H}_2\text{O}$ ).

**Table S1.** Selected bond length and angles of complex Fe<sub>2</sub>(BOBA)<sub>3</sub>

| Selected bond length(Å) |             |             |             |
|-------------------------|-------------|-------------|-------------|
| Fe(1)-O(1)              | Fe(1)-O(2)  | Fe(1)-O(3)  | Fe(1)-O(4)  |
| 2.009(6)                | 1.996(5)    | 1.986(6)    | 1.983(6)    |
| Fe(1)-O(5)              | Fe(1)-O(6)  | Fe(2)-O(7)  | Fe(2)-O(8)  |
| 2.005(6)                | 2.007(5)    | 1.990(6)    | 1.988(7)    |
| Fe(2)-O(9)              | Fe(2)-O(10) | Fe(2)-O(11) | Fe(2)-O(12) |
| 2.003(5)                | 2.008(6)    | 1.965(6)    | 1.999(6)    |

  

| Selected Angles (deg) |          |                   |          |
|-----------------------|----------|-------------------|----------|
| O(4)-Fe(1)-O(3)       | 86.4(2)  | O(4)-Fe(1)-O(2)   | 87.3(2)  |
| O(3)-Fe(1)-O(2)       | 103.2(2) | O(4)-Fe(1)-O(5)   | 99.5(3)  |
| O(3)-Fe(1)-O(5)       | 86.4(3)  | O(2)-Fe(1)-O(5)   | 168.6(3) |
| O(4)-Fe(1)-O(6)       | 86.9(3)  | O(3)-Fe(1)-O(6)   | 168.6(2) |
| O(2)-Fe(1)-O(6)       | 85.7(2)  | O(5)-Fe(1)-O(6)   | 85.6(2)  |
| O(4)-Fe(1)-O(1)       | 171.6(2) | O(3)-Fe(1)-O(1)   | 90.2(2)  |
| O(2)-Fe(1)-O(1)       | 86.1(2)  | O(5)-Fe(1)-O(1)   | 87.9(2)  |
| O(6)-Fe(1)-O(1)       | 97.7(3)  | O(11)-Fe(2)-O(7)  | 86.8(2)  |
| O(11)-Fe(2)-O(12)     | 86.0(2)  | O(7)-Fe(2)-O(12)  | 98.5(2)  |
| O(11)-Fe(2)-O(9)      | 87.4(2)  | O(7)-Fe(2)-O(9)   | 85.0(2)  |
| O(12)-Fe(2)-O(9)      | 172.4(3) | O(11)-Fe(2)-O(8)  | 170.8(3) |
| O(7)-Fe(2)-O(8)       | 86.9(3)  | O(12)-Fe(2)-O(8)  | 88.3(3)  |
| O(9)-Fe(2)-O(8)       | 98.7(3)  | O(11)-Fe(2)-O(10) | 99.8(3)  |
| O(7)-Fe(2)-O(10)      | 168.7(3) | O(12)-Fe(2)-O(10) | 91.2(2)  |
| O(9)-Fe(2)-O(10)      | 86.2(2)  | O(8)-Fe(2)-O(10)  | 87.4(3)  |

**Table S2.** Selected bond length and angles of complex Cd(BOBA)<sub>2</sub>(py)<sub>3</sub>

| Selected bond length(Å) |            |            |            |
|-------------------------|------------|------------|------------|
| Cd(1)-O(2)              | Cd(1)-N(1) | Cd(1)-O(4) | Cd(1)-N(3) |
| 2.312(5)                | 2.342(6)   | 2.346(5)   | 2.351(6)   |
| Cd(1)-N(2)              | Cd(1)-O(3) | Cd(1)-O(1) |            |
| 2.382(6)                | 2.498(5)   | 2.596(6)   |            |

  

| Selected Angles (deg) |           |                 |            |
|-----------------------|-----------|-----------------|------------|
| O(2)-Cd(1)-N(1)       | 134.5(2)  | O(2)-Cd(1)-O(4) | 88.2(2)    |
| N(1)-Cd(1)-O(4)       | 136.9(2)  | O(2)-Cd(1)-N(3) | 91.2(2)    |
| N(1)-Cd(1)-N(3)       | 89.2(2)   | O(4)-Cd(1)-N(3) | 96.5(2)    |
| O(2)-Cd(1)-N(2)       | 89.9(2)   | N(1)-Cd(1)-N(2) | 85.7(2)    |
| O(4)-Cd(1)-N(2)       | 89.6(2)   | N(3)-Cd(1)-N(2) | 173.8(2)   |
| O(2)-Cd(1)-O(3)       | 141.5(2)  | N(1)-Cd(1)-O(3) | 83.9(2)    |
| O(4)-Cd(1)-O(3)       | 53.30(19) | N(3)-Cd(1)-O(3) | 93.0(2)    |
| N(2)-Cd(1)-O(3)       | 89.9(2)   | O(2)-Cd(1)-O(1) | 52.52(19)  |
| N(1)-Cd(1)-O(1)       | 82.3(2)   | O(4)-Cd(1)-O(1) | 140.68(19) |
| N(3)-Cd(1)-O(1)       | 84.1(2)   | N(2)-Cd(1)-O(1) | 91.79(19)  |
| O(3)-Cd(1)-O(1)       | 165.9(2)  |                 |            |

**Table S3.** Selected bond length and angles of ligand BOBA

| Selected bond length(Å) |             |             |           |
|-------------------------|-------------|-------------|-----------|
| O(2)-C(11)              | O(4)-C(9)   | C(3)-C(4)   | C(3)-C(2) |
| 1.278(4)                | 1.288(4)    | 1.381(5)    | 1.387(5)  |
| C(3)-C(11)              | O(6)-C(15)  | O(1)-C(13)  | O(3)-C(7) |
| 1.480(5)                | 1.236(4)    | 1.277(4)    | 1.279(4)  |
| O(5)-C(15)              | C(12)-C(13) | C(12)-C(11) | C(1)-C(2) |
| 1.272(4)                | 1.384(5)    | 1.393(5)    | 1.379(5)  |
| C(1)-C(6)               | C(1)-C(15)  | C(4)-C(5)   | C(6)-C(5) |
| 1.381(5)                | 1.485(5)    | 1.388(5)    | 1.389(5)  |
| C(9)-C(8)               | C(9)-C(10)  | C(5)-C(7)   | C(8)-C(7) |
| 1.382(5)                | 1.486(5)    | 1.480(5)    | 1.388(5)  |
| C(13)-C(14)             |             |             |           |
| 1.487(5)                |             |             |           |

  

| Selected Angles (deg) |          |                   |          |
|-----------------------|----------|-------------------|----------|
| C(4)-C(3)-C(2)        | 118.6(3) | C(4)-C(3)-C(11)   | 122.7(3) |
| C(2)-C(3)-C(11)       | 118.7(3) | C(13)-C(12)-C(11) | 120.1(3) |
| C(2)-C(1)-C(6)        | 120.5(3) | C(2)-C(1)-C(15)   | 119.9(3) |
| C(6)-C(1)-C(15)       | 119.6(3) | C(3)-C(4)-C(5)    | 121.6(3) |
| C(1)-C(6)-C(5)        | 119.8(3) | C(1)-C(2)-C(3)    | 120.5(3) |
| O(4)-C(9)-C(8)        | 122.3(3) | O(4)-C(9)-C(10)   | 116.0(3) |
| C(8)-C(9)-C(10)       | 121.7(3) | C(4)-C(5)-C(6)    | 119.0(3) |
| C(4)-C(5)-C(7)        | 118.7(3) | C(6)-C(5)-C(7)    | 122.3(3) |
| C(9)-C(8)-C(7)        | 121.2(3) | O(3)-C(7)-C(8)    | 121.2(3) |
| O(3)-C(7)-C(5)        | 115.2(3) | C(8)-C(7)-C(5)    | 123.6(3) |
| O(2)-C(11)-C(12)      | 120.1(3) | O(2)-C(11)-C(3)   | 116.1(3) |
| C(12)-C(11)-C(3)      | 123.8(3) | O(6)-C(15)-O(5)   | 123.9(3) |
| O(6)-C(15)-C(1)       | 120.3(3) | O(5)-C(15)-C(1)   | 115.8(3) |
| O(1)-C(13)-C(12)      | 121.9(3) | O(1)-C(13)-C(14)  | 115.7(3) |
| C(12)-C(13)-C(14)     | 122.4(3) |                   |          |

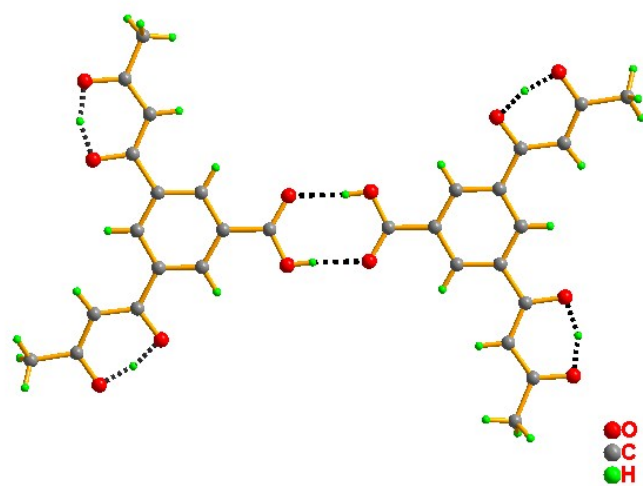

**Fig. S1** Dimer structure of ligand BOBA molecular showing intermolecular hydrogen bonds

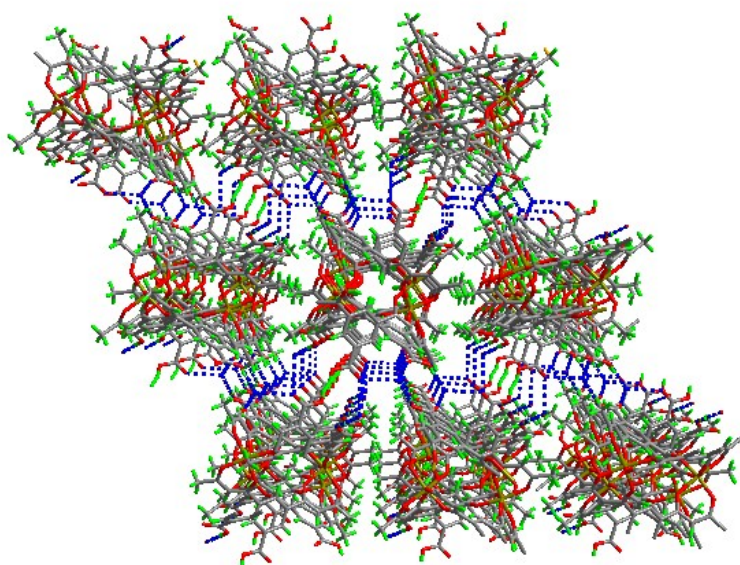

**Fig. S2** Perspective views of hydrogen bond network and  $\pi$ - $\pi$  stacking interactions in BOBA.

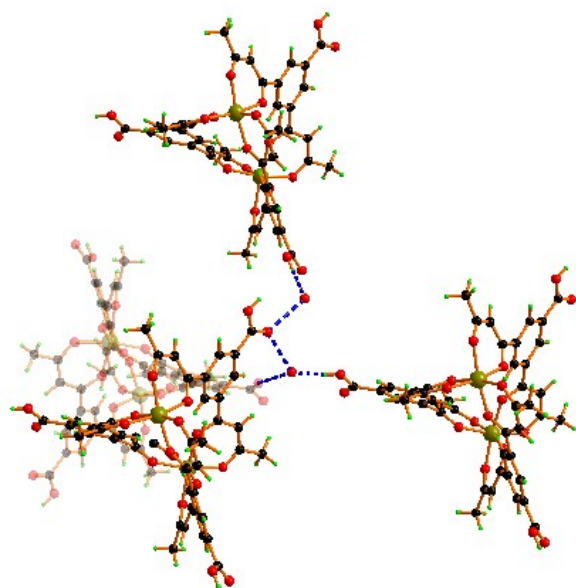

**Fig. S3** Perspective views of hydrogen bonds interactions in complex Fe<sub>2</sub>(BOBA)<sub>3</sub>.

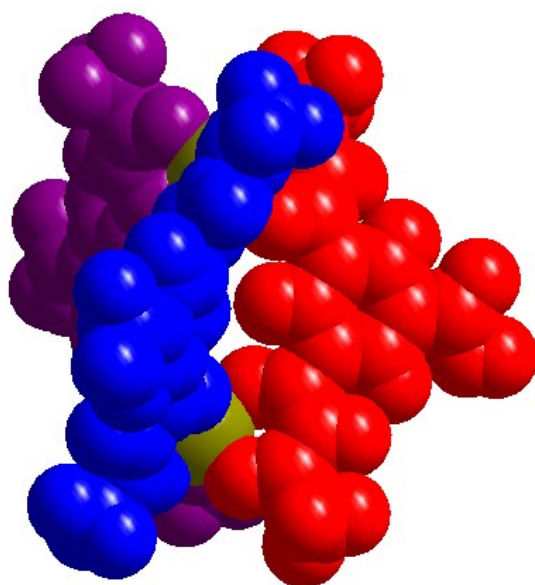

**Fig. S4** Space fill representation of complex  $\text{Fe}_2(\text{BOBA})_3$ , the nonmetal atoms of three strands and iron atoms are differently colored for clarity



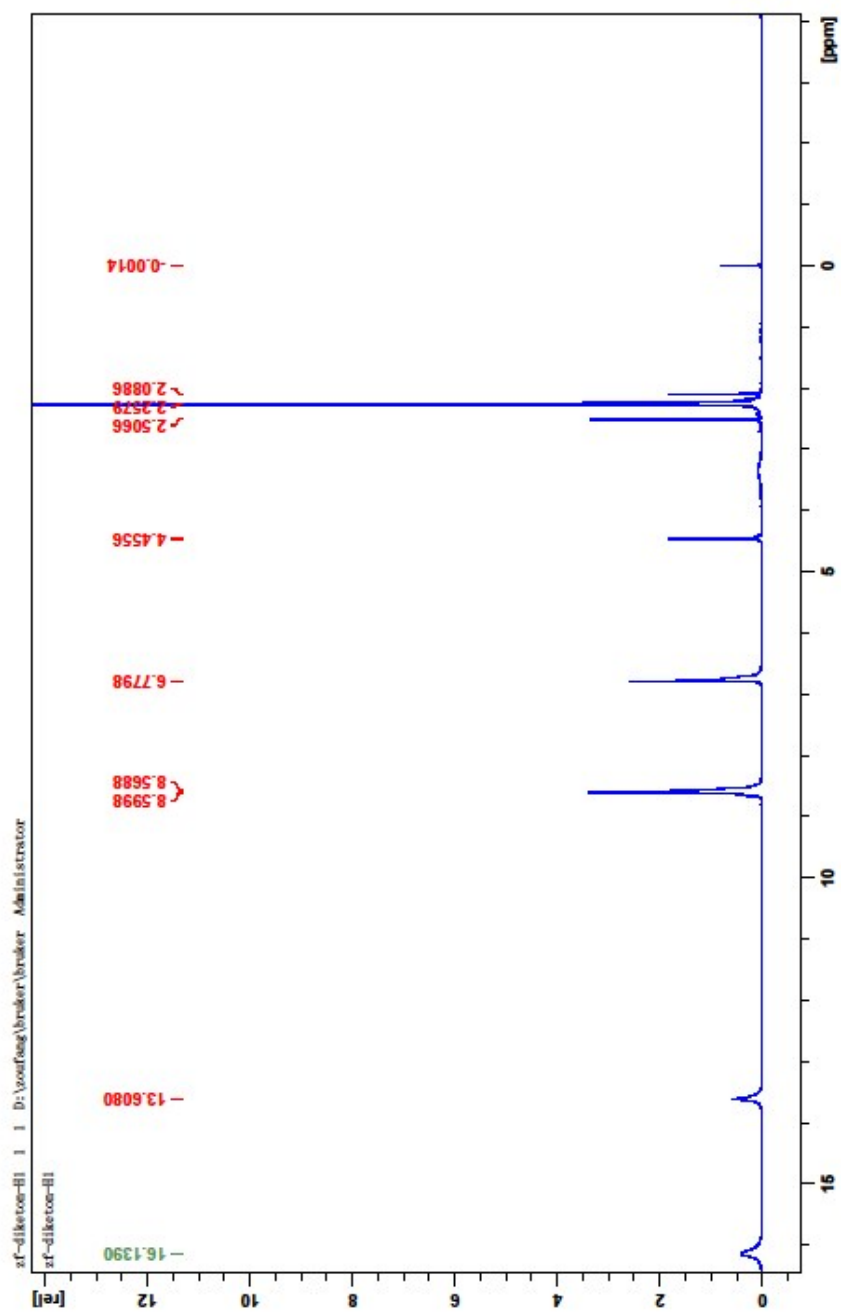

Fig. S5  $^1\text{H}$  NMR (500 MHz) spectra of ligand BOBA in  $(\text{CD}_3)_2\text{CO}$

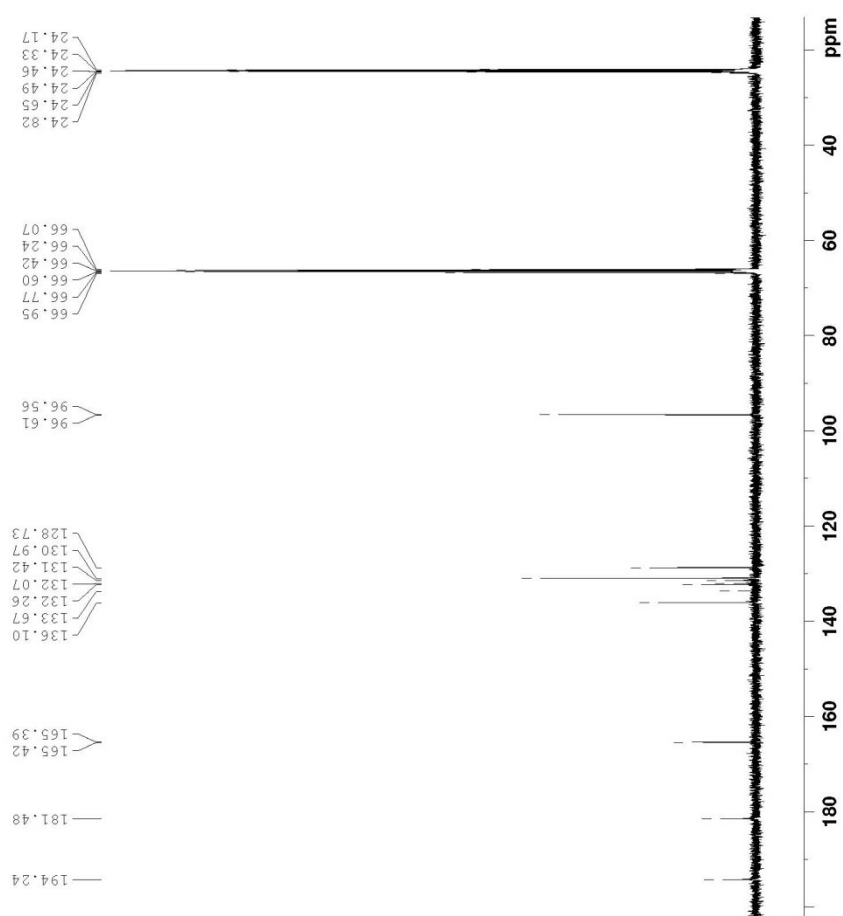

**Fig. S6**  $^{13}\text{C}$  NMR (500 MHz) spectra of ligand BOBA in THF- $d_8$

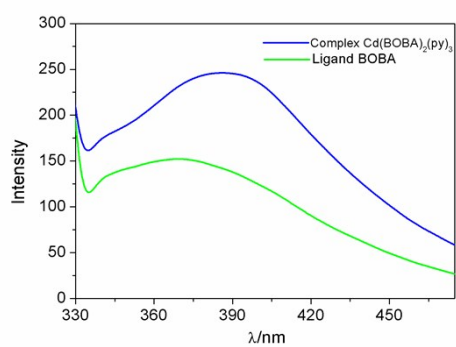

**Fig. S7** Emission spectra of ligand BOBA and complex Cd(BOBA)<sub>2</sub>(py)<sub>3</sub> ( $\lambda_{exc} = 289 \text{ nm}$ ,  $5.0 \times 10^{-6} \text{ M}$  in degassed H<sub>2</sub>O).
